# Supplementary material for: A new chiral N-heterocyclic carbene silver(i) cylinder: synthesis, crystal structure and catalytic properties
Source: Royal Society of Chemistry journal article supplement (doi:10.1039/c000793e), 2010-01-01
Supplement: c000793e.pdf [file c000793e.pdf]

## Supporting Information

# A New Chiral N-heterocyclic Carbene Silver(I) Cylinder: Synthesis, Crystal Structure and Catalytic Properties

Dehui Wang,<sup>a</sup> Bingguang Zhang,<sup>\*b</sup> Cheng He,<sup>a</sup> Pengyan Wu<sup>a</sup> and Chunying Duan<sup>\*a</sup>

- a. State Key Laboratory of Fine Chemicals, Dalian University of Technology, Dalian 116012, China. E-mail: [cyduan@dlut.edu.cn](mailto:cyduan@dlut.edu.cn)
- b. Key Laboratory of Catalysis and Materials Science of the State Ethnic Affairs Commission & Ministry of Education, South-Central University for Nationalities, Wuhan 430074, China.

## Contents

### 1. Experimental Section.

**Scheme 1** Synthesis of **Ag-CNHC**.

Synthesis of **Ag-CNHC**.

General procedure for the preparation of asymmetric cyanosilylation of imine reactions.

Physical data of the asymmetric cyanosilylation of imine products.

### 2. **Figure S1** Molecular structure of the **CNHC** cation

### 3. **Figure S2** <sup>1</sup>H-NMR, <sup>13</sup>C-NMR and MALDI-Tof spectra of the **Ag-CNHC** in d<sup>6</sup>-DMSO.

### 4. **Figure S3** <sup>1</sup>H-NMR, <sup>13</sup>C-NMR and ESI-MS spectra of the **CNHC** in d<sup>6</sup>-DMSO.

### 5. **Figure S4** CD spectrum of the **Ag-CNHC** in CH<sub>2</sub>Cl<sub>2</sub> solution.

### 6. **Figure S5** <sup>1</sup>H NMR and HPLC analysis for product of the reaction of entry 1

### 7. **Figure S6** <sup>1</sup>H NMR and HPLC analysis for product of the reaction of entry 2

### 8. **Figure S7** <sup>1</sup>H NMR and HPLC analysis for product of the reaction of entry 3

### 9. **Table S1** Control experiments of the asymmetric cyanosilylation of imine reactions.

## 1. Experimental Section.

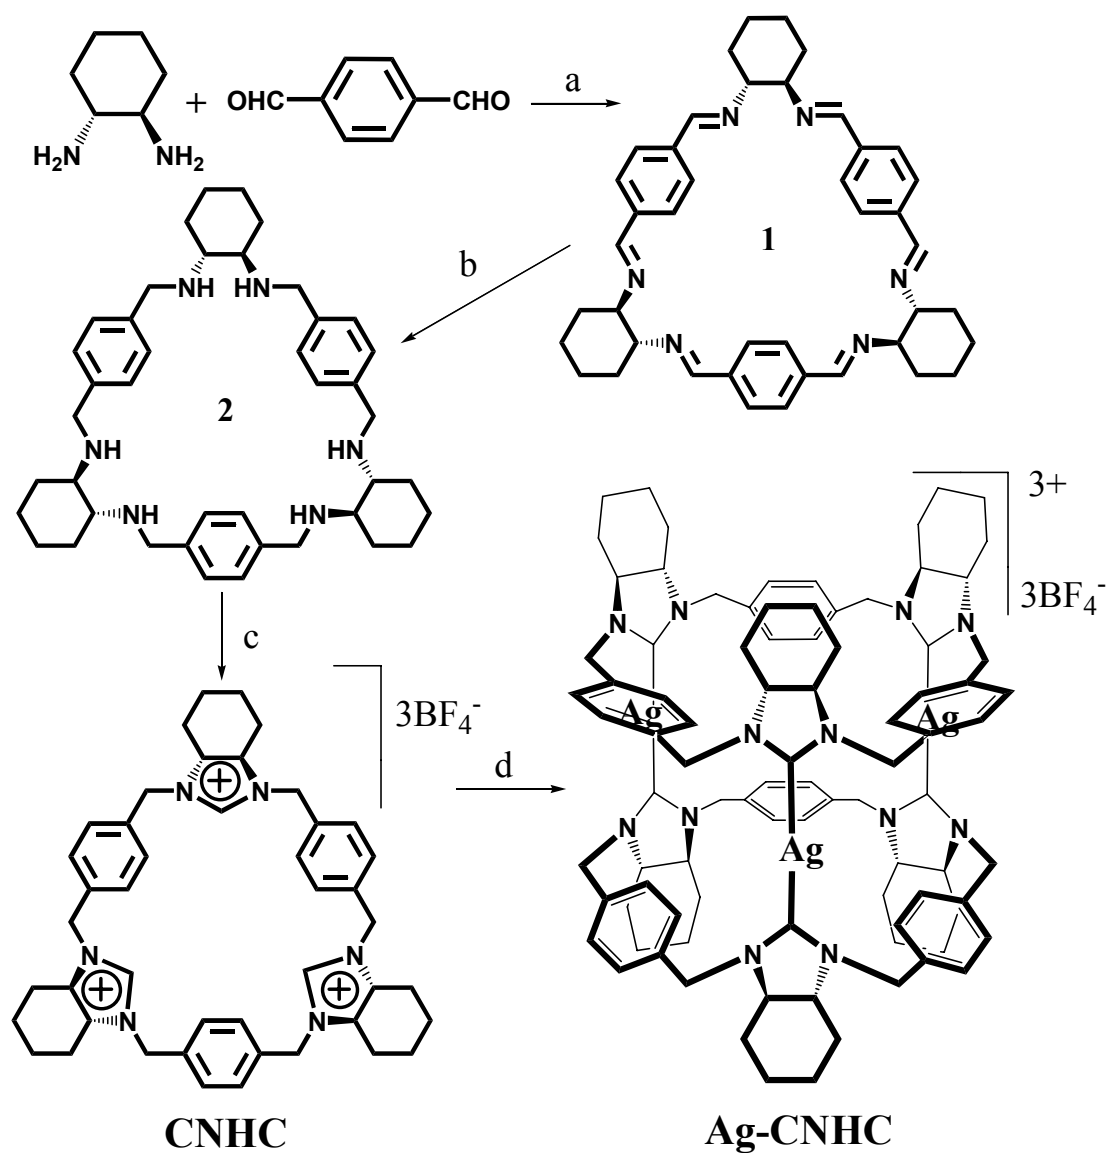

**Scheme 1** Synthesis of **Ag-CNHC**. Reagents and conditions: (a) (1R, 2R)-(-)-1,2-Diaminocyclohexane, Terephthalaldehyde,  $\text{CH}_3\text{CN}$ ,  $25^\circ\text{C}$ , 14h, 88%; (b)  $\text{NaBH}_4$ ,  $\text{CH}_3\text{OH}$ ,  $0^\circ\text{C}$ , 12h, 65%; (c) Triethylorthoformate,  $\text{NH}_4\text{BF}_4$ , xylene,  $120^\circ\text{C}$ , 4h, 68%; (d)  $\text{Ag}_2\text{O}$ , DMSO,  $80^\circ\text{C}$ , 48h, 58%.

## Experimental

Materials unless otherwise stated, were obtained from commercial suppliers and used without further purification.  $^1\text{H}$  NMR and  $^{13}\text{C}$  NMR spectra were measured on a VARIAN INOVA-400 spectrometer with chemical shifts reported as ppm (in  $d^6$ -DMSO and  $\text{CDCl}_3$ , TMS as internal standard). Mass spectrometric data were obtained on a HP1100LC/MSD mass spectrometry and a LCQ-ToF MS spectrometry and a MALDI micro MX<sup>TM</sup> spectrometry. The CD spectra was measured on JASCO J-810. HPLC analysis was performed on Agilent 1100 using a ChiralPak AD-H column purchased from Daicel Chemical Industries, Ltd. Products were purified by flash column chromatography on 100-200 mesh silica gel,  $\text{SiO}_2$ .

**Preparation of CNHC:** Compound **2** and **CNHC** were prepared according to the literature (Chem. Commun., 2004, 2206-2207). In a stirring 180 mL dry xylene solution containing **2** (1.3 g, 2 mmol) at  $100^\circ\text{C}$ , 2.5 g triethylorthoformate in 30 mL dry xylene were added dropwise. After refluxing for 3 hours, 1.25 g  $\text{NH}_4\text{BF}_4$  was added. The reaction was carried out at  $100^\circ\text{C}$  for another 3 hours, and then heated to  $120^\circ\text{C}$ , kept for 1 hour. White powder of crude product was obtained by cooling the solution to room temperature. Colorless crystalline solid **CNHC** was obtained by recrystallization the original powder with water and dried under vacuum, yield 0.82 g.  $^1\text{H}$  NMR ( $d^6$ -DMSO, ppm)  $\delta$ : 9.15 (s, 3H,  $\text{H}_{\text{CH-}}$ ), 7.45 (s, 12H,  $\text{H}_{\text{Ar}}$ ), 4.84 (12H,  $\text{H}_{\text{CH}_2}$ ), 3.36 (m, 12H,  $\text{H}_{\text{cyclohexanyl}}$ ), 2.03 (d, 6H,  $\text{H}_{\text{cyclohexanyl}}$ ,  $J = 4.0$  Hz), 1.67 (d, 6H,  $\text{H}_{\text{cyclohexanyl}}$ ,  $J = 4.0$  Hz), 1.21 (m, 6H,  $\text{H}_{\text{cyclohexanyl}}$ ), 1.07 (m, 6H,  $\text{H}_{\text{cyclohexanyl}}$ ).  $^{13}\text{C}$  NMR ( $d^6$ -DMSO, ppm)  $\delta$ : 160.30, 133.34, 127.30, 65.77, 47.80, 25.63, 21.92. API-MS  $m/z$ : 227.4 [**CNHC**]<sup>3+</sup>, 349.3 [**CNHC**+ $\text{H}_2\text{O}$ ]<sup>2+</sup>, 384.4 [**CNHC**+ $\text{BF}_4$ ]<sup>2+</sup>, 715.4 [**CNHC**+3 $\text{BF}_4$ +2 $\text{H}_2\text{O}$ ]<sup>+</sup>, 785.4 [**CNHC**+ $\text{BF}_4$ + $\text{H}_2\text{O}$ ]<sup>+</sup>, 855.4 [**CNHC**+2 $\text{BF}_4$ ]<sup>+</sup>. Single crystals of **CNHC** were prepared by following procedure. Diethyl ether was slowly diffused into the  $\text{CH}_3\text{CN}$  solution of **CNHC** to afford X-ray quality colorless crystals.

**Preparation of Ag-CNHC:** To a mixture of **CNHC** (0.2 g, 0.215 mmol) and  $\text{Ag}_2\text{O}$  (0.154 g, 0.645 mmol) was added DMSO (30 mL). The mixture was heated at  $80^\circ\text{C}$  for 48 hours under the dark and a nitrogen atmosphere. The solution was filtered. The filtrate was diluted with water (200 mL) and the product precipitated. The pure precipitate was collected by filtration as a white

powder in 58% yield.  $^1\text{H}$  NMR ( $d_6$ -DMSO, ppm)  $\delta$ : 7.52 (m, 24H,  $\text{H}_{\text{Ar}}$ ), 5.14 (d, 6H,  $\text{H}_{\text{CH}_2}$ ,  $J = 8.0$  Hz), 4.99 (d, 6H,  $\text{H}_{\text{CH}_2}$ ,  $J = 8.0$  Hz), 4.47 (d, 6H,  $\text{H}_{\text{CH}_2}$ ,  $J = 8.0$  Hz), 4.32 (d, 6H,  $\text{H}_{\text{CH}_2}$ ,  $J = 8.0$  Hz), 3.21 (t, 6H,  $\text{H}_{\text{cyclohexanyl}}$ ,  $J = 14.0$  Hz), 2.84 (t, 6H,  $\text{H}_{\text{cyclohexanyl}}$ ,  $J = 14.0$  Hz), 2.06 (d, 6H,  $\text{H}_{\text{cyclohexanyl}}$ ,  $J = 4.0$  Hz), 1.97 (d, 6H,  $\text{H}_{\text{cyclohexanyl}}$ ,  $J = 4.0$  Hz), 1.62 (t, 12H,  $\text{H}_{\text{cyclohexanyl}}$ ,  $J = 14.0$  Hz), 1.39 (m, 6H,  $\text{H}_{\text{cyclohexanyl}}$ ), 1.12 (m, 6H,  $\text{H}_{\text{cyclohexanyl}}$ ), 0.89 (m, 12H,  $\text{H}_{\text{cyclohexanyl}}$ ).  $^{13}\text{C}$  NMR ( $d_6$ -DMSO, ppm)  $\delta$ : 210.30, 208.50, 137.51, 134.65, 129.05, 127.96, 69.36, 65.40, 53.86, 51.26, 53.86, 51.26, 28.43, 27.43, 23.88, 23.45, 19.01, 15.63. ESI-MS: 560.51 [ $\text{Ag-CNHC}$ ] $^{3+}$ ; 884.24 [ $\text{Ag-CNHC}+\text{BF}_4$ ] $^{2+}$ . Single crystals of **Ag-CNHC** were prepared by following procedure. Recrystallization from dichloromethane/ether afforded X-ray quality colorless crystals.

#### **General Procedure for the Preparation of Asymmetric Cyanosilylation of Imine Reactions:**

To a mixture of  $\text{Me}_3\text{SiCN}$  (1.2 mmol) and imines derivatives (0.5 mmol) was added **Ag-CNHC** (0.01 mmol) and the resulting mixture were stirred at rt for seven days. The reaction was monitored by TLC. Conversion were determined by  $^1\text{H}$ -NMR spectra. The e.e. value of the product were determined by HPLC analysis.

#### **Physical Data of the Asymmetric Cyanosilylation of Imine Products:**

**2-phenyl-2-(phenylamino)acetonitrile.** Purification by column chromatography (gradient elution with  $\text{CH}_2\text{Cl}_2$ ) afforded the product as a colorless oil:  $^1\text{H}$  NMR (400 MHz,  $\text{CDCl}_3$ )  $\delta$ : 7.49(m, 2H,  $\text{H}_{\text{Ar}}$ ), 7.37(m, 1H,  $\text{H}_{\text{Ar}}$ ), 7.31(m, 2H,  $\text{H}_{\text{Ar}}$ ), 7.18(t, 2H,  $\text{H}_{\text{Ar}}$ ), 7.12(m, 1H,  $\text{H}_{\text{Ar}}$ ), 6.78(t, 1H,  $\text{H}_{\text{NH}}$ ), 6.65(d, 2H,  $\text{H}_A$ ), 5.31(s, 1H,  $\text{H}_{\text{Tert-butyl}}$ ).

**2-(4-(dimethylamino)phenyl)-2-(phenylamino)acetonitrile.** Purification by column chromatography (gradient elution with  $\text{CH}_2\text{Cl}_2$ ) afforded the product:  $^1\text{H}$  NMR (400 MHz,  $\text{CDCl}_3$ )  $\delta$ : 7.42(d, 2H,  $\text{H}_{\text{Ar}}$ ), 7.28(d, 2H,  $\text{H}_{\text{Ar}}$ ), 6.88(t, 1H,  $\text{H}_{\text{Ar}}$ ), 6.76(t, 2H,  $\text{H}_{\text{Ar}}$ ), 7.12(m, 1H,  $\text{H}_{\text{Ar}}$ ), 6.78(t, 2H,  $\text{H}_{\text{Ar}}$ ), 5.30(d, 1H,  $\text{H}_{\text{Tert-butyl}}$ ), 3.92(s, 1H,  $\text{H}_{\text{NH}}$ ), 2.99(s, 6H,  $\text{H}_{\text{CH}_3}$ ).

**2-(p-toluidino)-2-phenylacetonitrile.** Purification by column chromatography (gradient elution with  $\text{CH}_2\text{Cl}_2$ ) afforded the product:  $^1\text{H}$  NMR (400 MHz,  $\text{CDCl}_3$ )  $\delta$ : 7.60 (d, 2H,  $\text{H}_{\text{Ar}}$ ), 7.48 (m, 1H,  $\text{H}_{\text{Ar}}$ ), 7.46 (d, 2H,  $\text{H}_{\text{Ar}}$ ), 7.09 (d, 2H,  $\text{H}_{\text{Ar}}$ ), 6.70 (d, 2H,  $\text{H}_{\text{Ar}}$ ), 5.41 (d, 1H,  $\text{H}_{\text{Tert-butyl}}$ ).

**2. Figure S1** Molecular structure of the **CNHC** cation showing the bowl-like cationic character, the anions ( $\text{BF}_4^-$ ) and solvent molecules are omitted for clarify. Selected bond lengths ( $\text{\AA}$ ) and angle ( $^\circ$ ):  $\text{N}(1)\text{--C}(8)$  1.320(5),  $\text{N}(2)\text{--C}(8)$  1.310(5); and  $\text{N}(2)\text{--C}(8)\text{--N}(1)$  113.5(4).

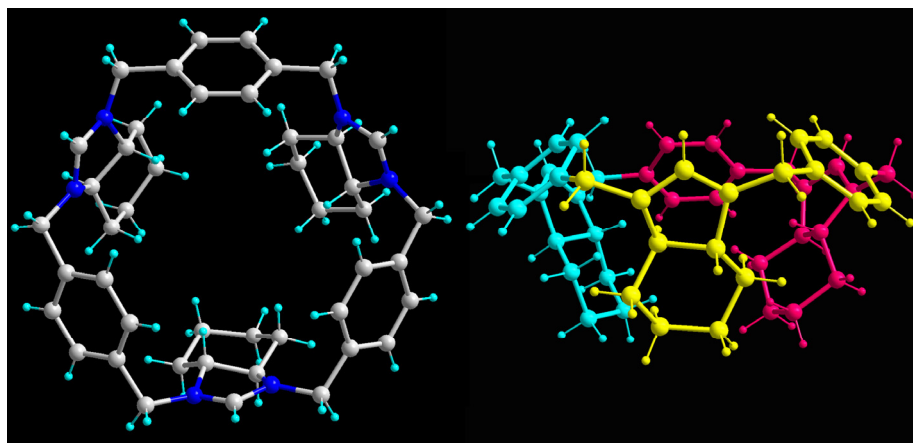

**3. Figure S2**  $^1\text{H}$ -NMR (top picture) ,  $^{13}\text{C}$ -NMR (middle picture) and MALDI-TOF (bottom picture) spectra of the **Ag-CNHC** in  $\text{d}^6$ -DMSO

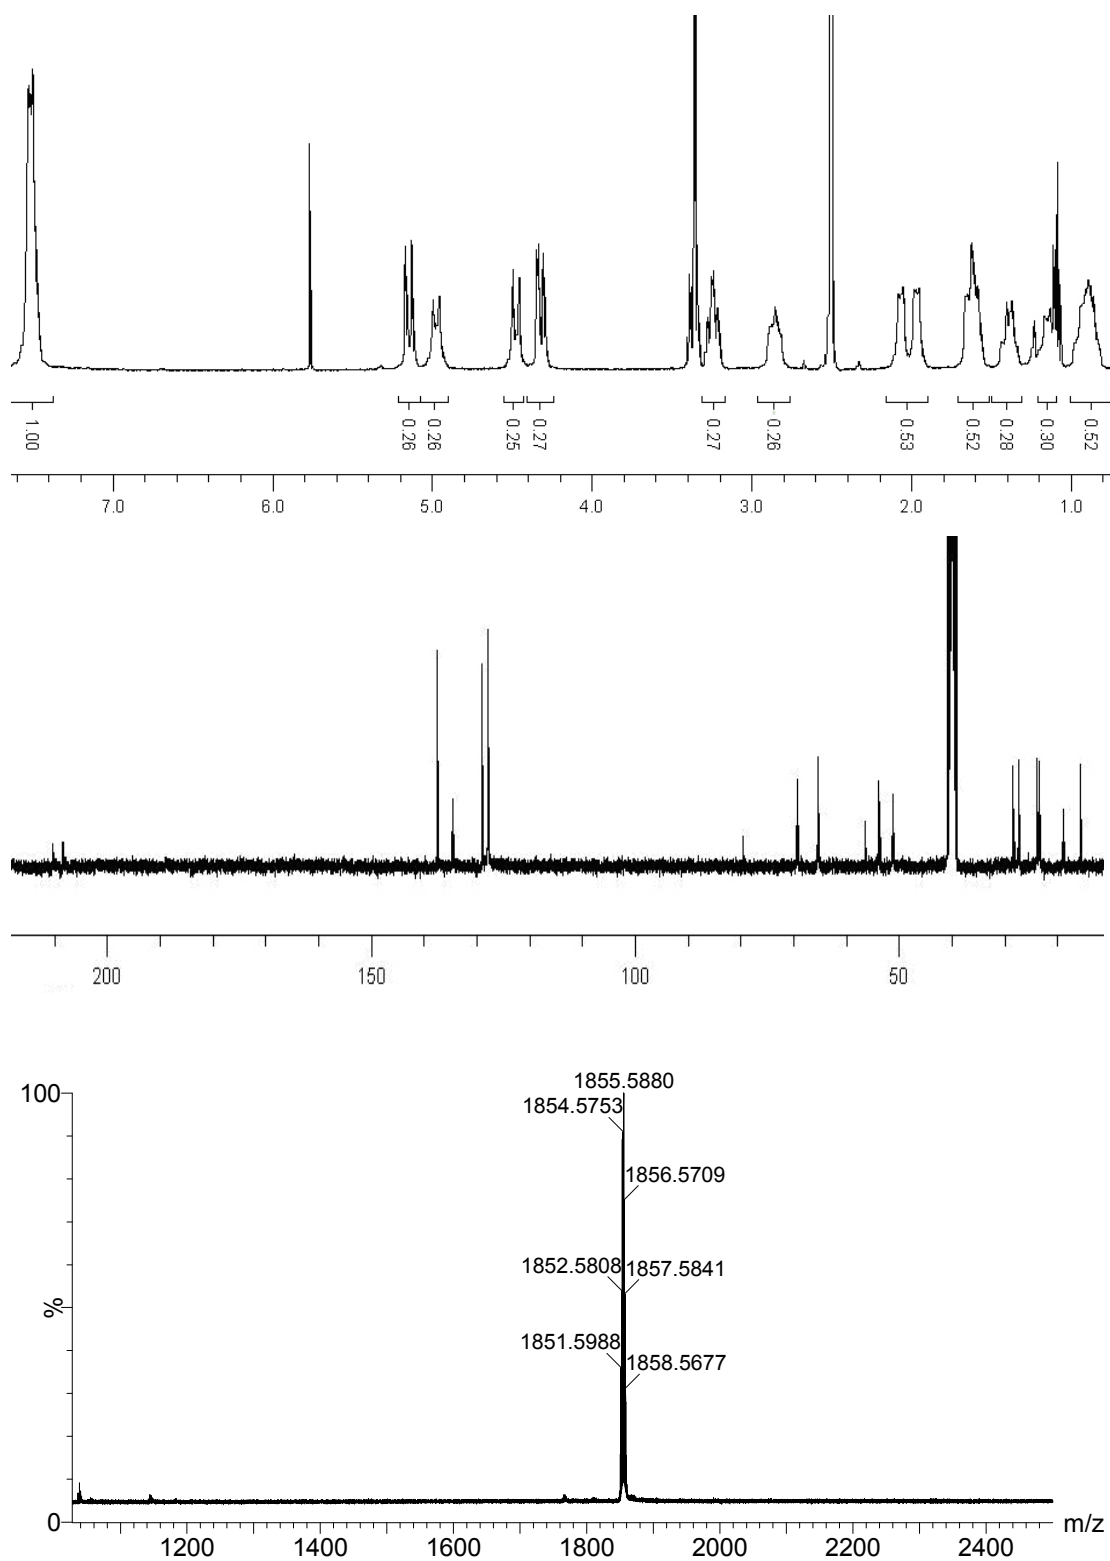

**4. Figure S3**  $^1\text{H-NMR}$  (top picture),  $^{13}\text{C-NMR}$  (middle picture) and ESI-MS spectrum (bottom one) spectra of the **CNHC** in  $\text{d}^6\text{-DMSO}$

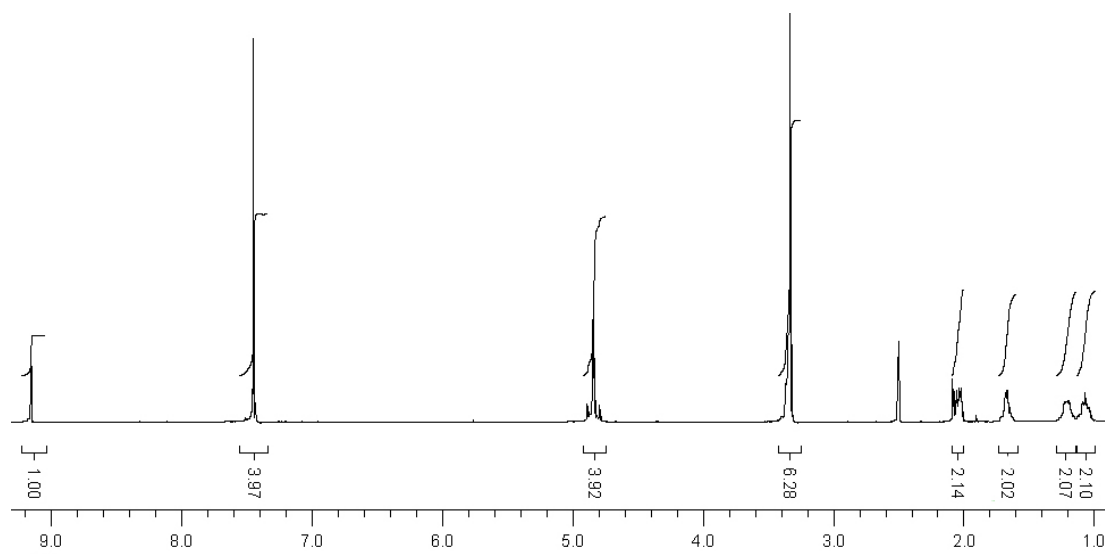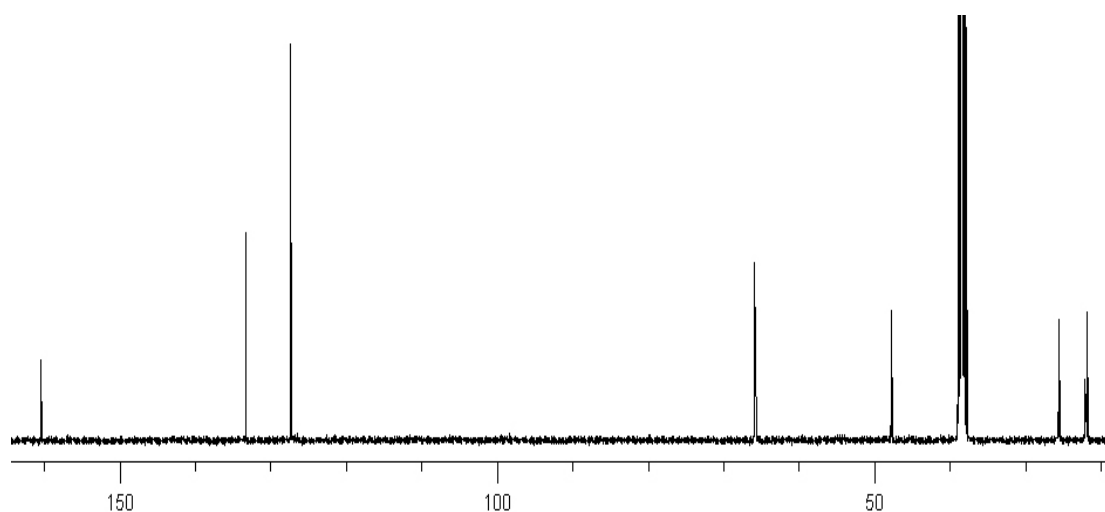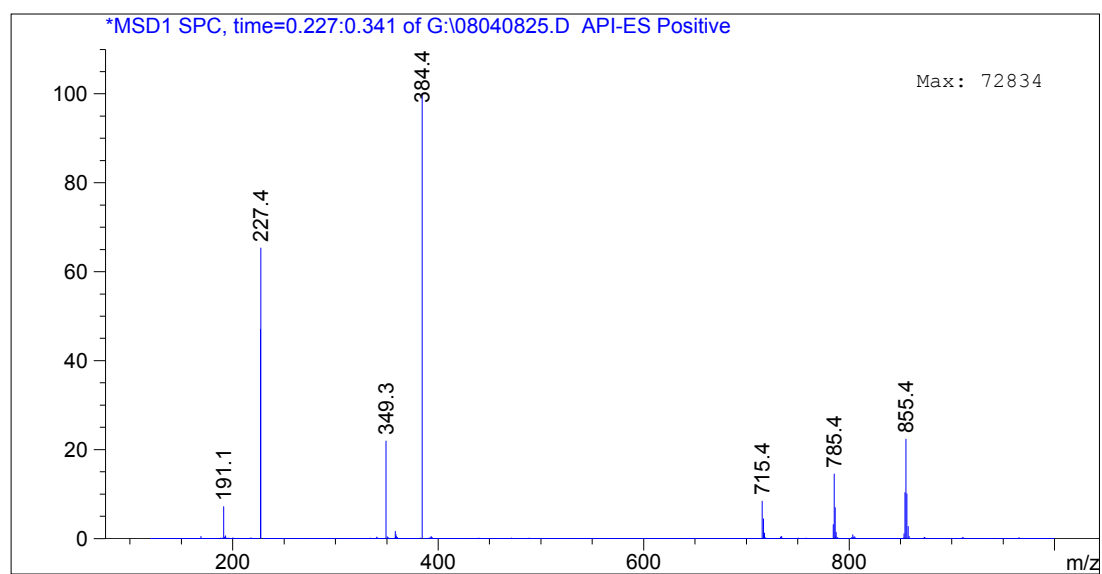

**5. Figure S4** CD spectrum of the Ag-CNHC in CH<sub>2</sub>Cl<sub>2</sub> solution.

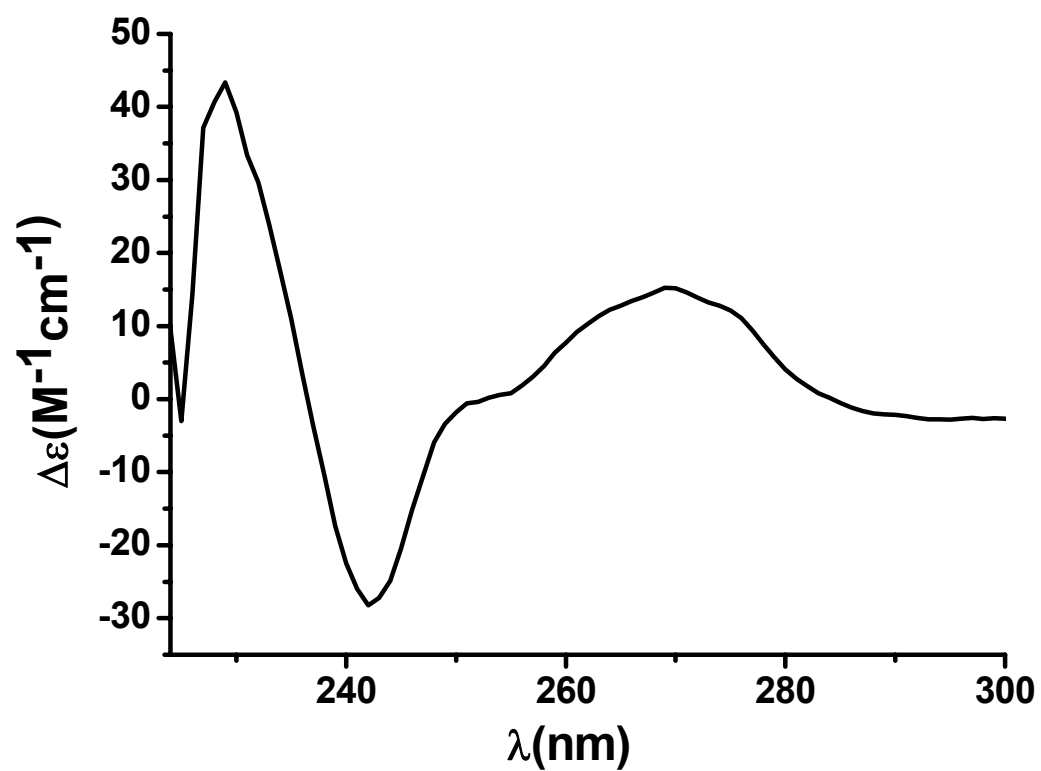



## 6. Figure S5 $^1\text{H}$ NMR and HPLC analysis for product of the reaction of entry 1

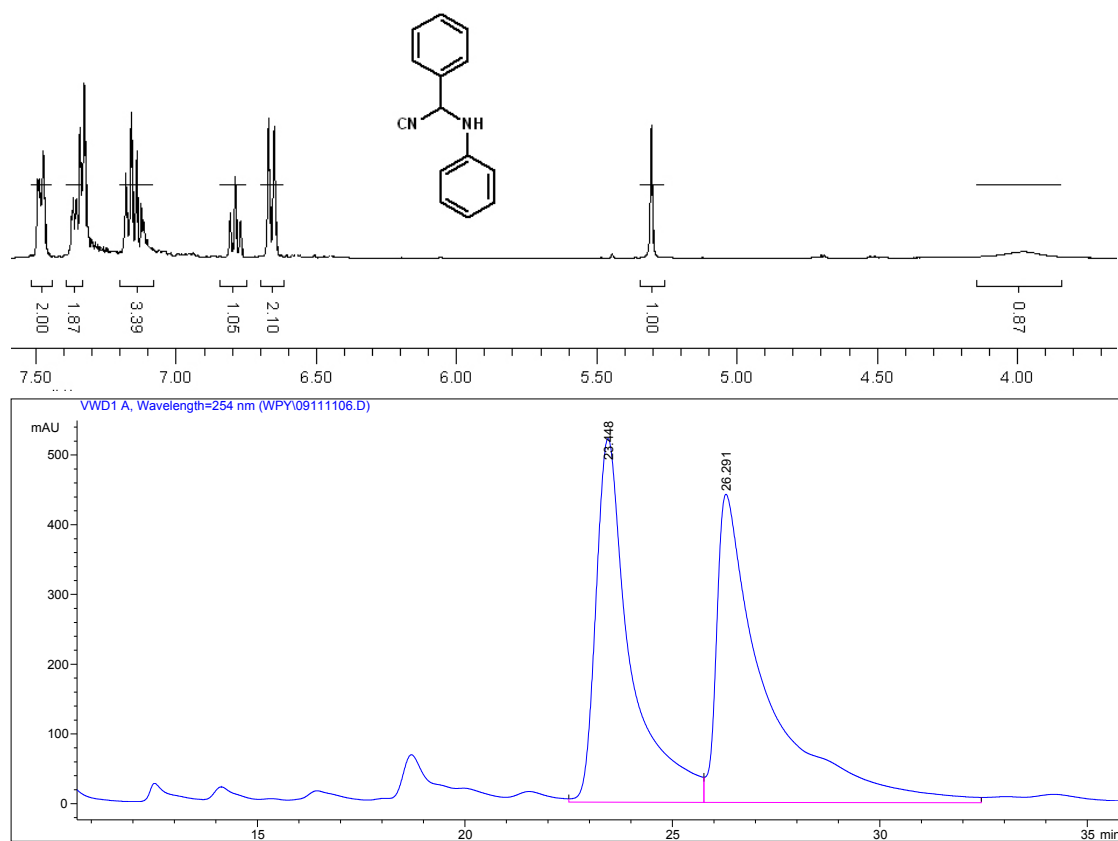

### 7. Figure S6 $^1\text{H}$ NMR and HPLC analysis for product of the reaction of entry 2

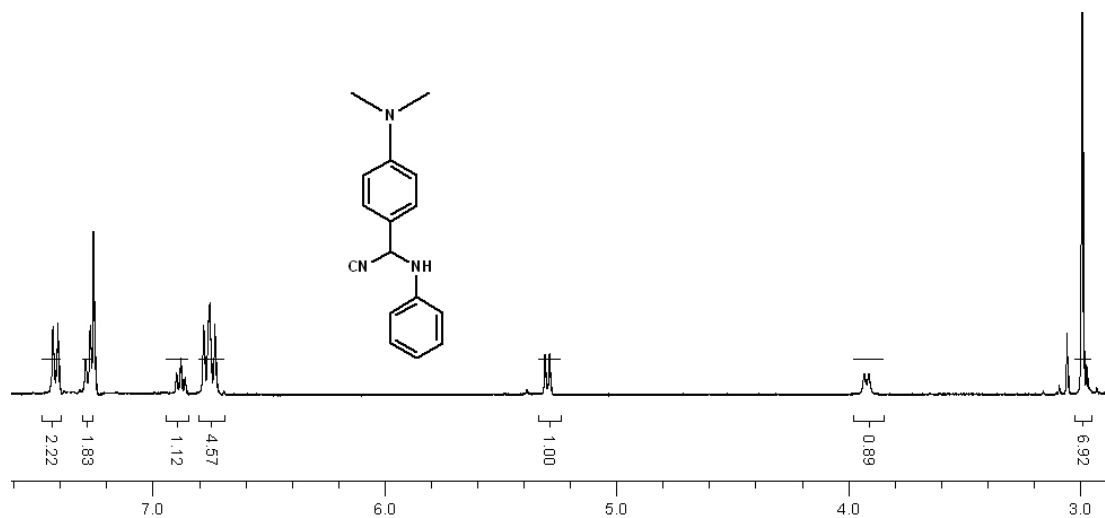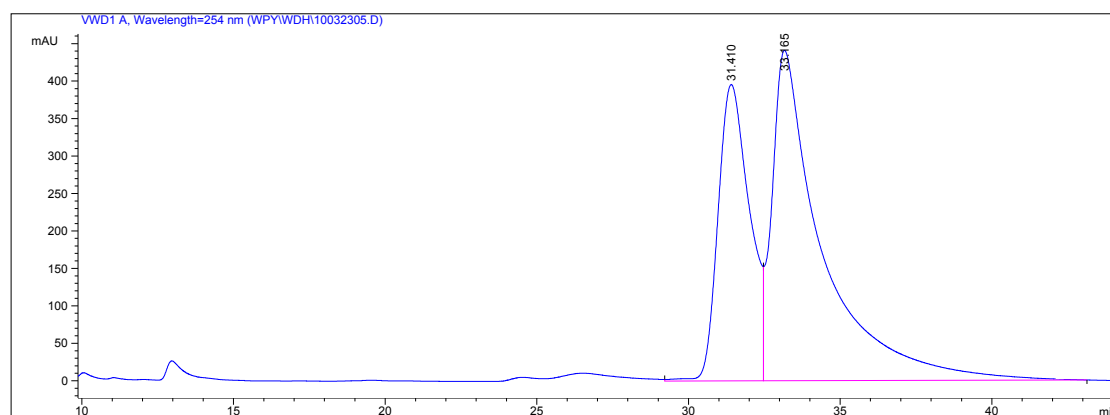

**8. Figure S7**  $^1\text{H}$  NMR and HPLC analysis for product of the reaction of entry 3

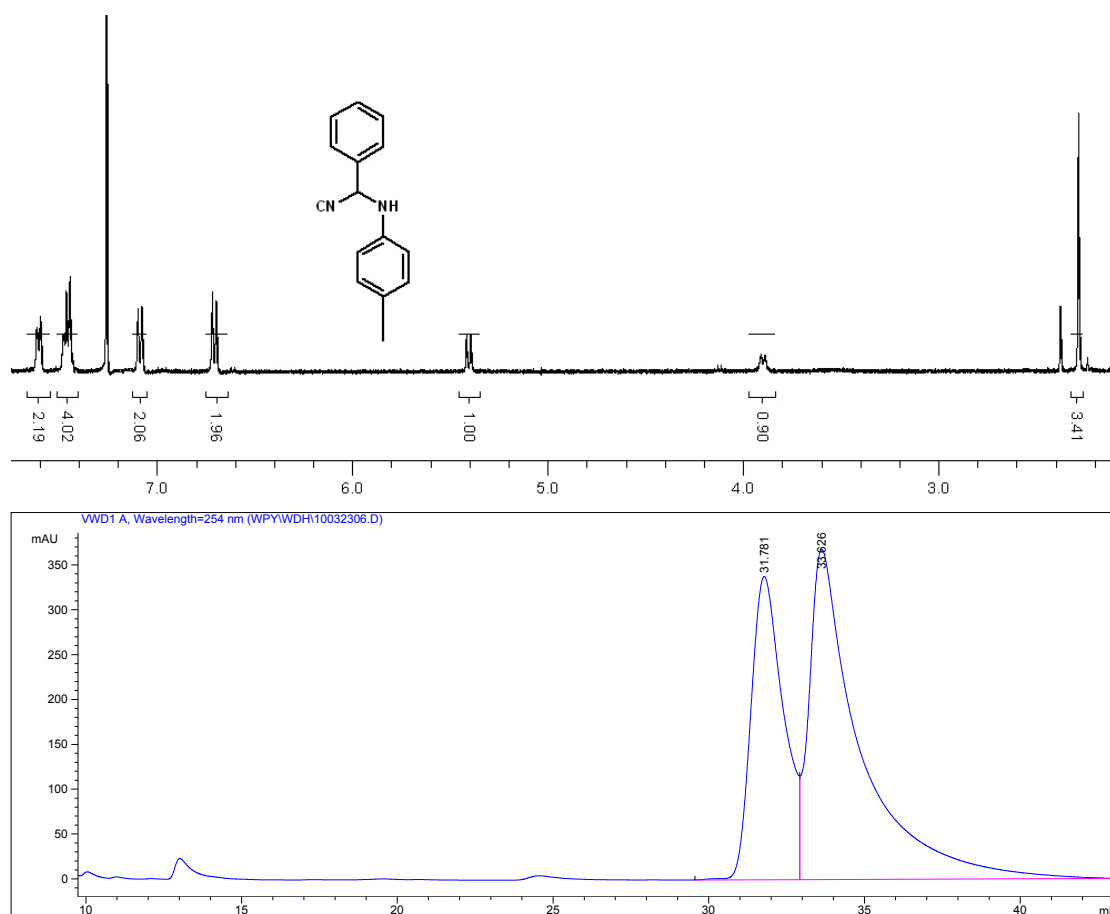

**9. Table S1** Control experiments: Me<sub>3</sub>SiCN (1.2 mmol) , N-benzylidenebenzenamine (0.5 mmol) and CNHC (0.01 mmol) were stirred at the same condition with the catalytic reactions above.

| Ar <sub>1</sub> CH=NAr <sub>2</sub> | Yield(%) | <i>e.e.</i> (%) |
|-------------------------------------|----------|-----------------|
| PhCH=NPha                           | 48       | 10              |
